# Supplementary material for: Hnf1b controls pancreas morphogenesis and the generation of Ngn3+ endocrine progenitors
Source: Oxford University Press journal article supplement (doi:10.1242/dev.110759), 2015-02-27
Supplement: dev110759supp.pdf [file dev110759supp.pdf]

## **Supplemental Methods**

### **Chromatin immunoprecipitation studies**

E12.5 dissected WT pancreata were fixed in 1% formaldehyde at RT for 10 min and quenched with 125 mM glycine. Nuclei were lysed in RIPA buffer, flash-frozen in liquid nitrogen and kept at -80° C. Chromatin pools (n=150) were sonicated (15x 10sec ON / 1min30 OFF, Bioruptor UCD-200TM-EX) to obtain fragments of ~500bp, and then incubated overnight at 4° C with 4 µg of Hnf1b or rabbit IgG antibodies (both from Santa-Cruz).

The Hnf1b antibody (H85, Santa Cruz) was raised against a non-conserved domain between the dimerization domain and the POU specific domain of HNF1b and it does not cross react with HNF1a. It was extensively validated by immunoprecipitation, immunofluorescence and western blot techniques using WT and mutant tissues. Antibody specificity was further determined by the formation of specific supershifts on gel shift binding assays using either kidney extracts or extracts from transfected cells overexpressing Hnf1b or Hnf1a proteins. Furthermore, the ability of the antibody to react with endogenous Hnf1b protein in cross-linked chromatin was analyzed by ChIP on embryonic kidneys, assaying two well-known targets genes: Ksp-Cadherin and Wnt9 (first intron) (see Heliot and Cereghini, 2012; Heliot et al, 2013; Lokmane et al, 2010).

Chromatin-antibody complexes were immunoprecipitated with Protein-A agarose (Roche). Eluted chromatin was decrosslinked at 65°C and purified by phenol/chloroform extraction. Immunoprecipitated chromatin and input (0.01% dilution) were analyzed by qPCR. These data were normalized to a reference DNA (pool of diluted inputs) and then expressed as fold enrichment relative to the values obtained with the immunoprecipitated chromatin using the non-immune IgG serum. A total of 4 targets were analyzed in duplicate per ChIP experiment, with at least 3 independent experiments performed for each of these targets.

**Figure S1. No phenotypic difference between control and heterozygous pancreata.** Haematoxylin/Eosin staining of control and heterozygous *Pdx1-Cre;Hnf1b*<sup>+/*Flox*</sup> pancreata at E16.5, showing no morphological difference in acinar, endocrine and ductal cells. Scale bars: 50  $\mu$ m.

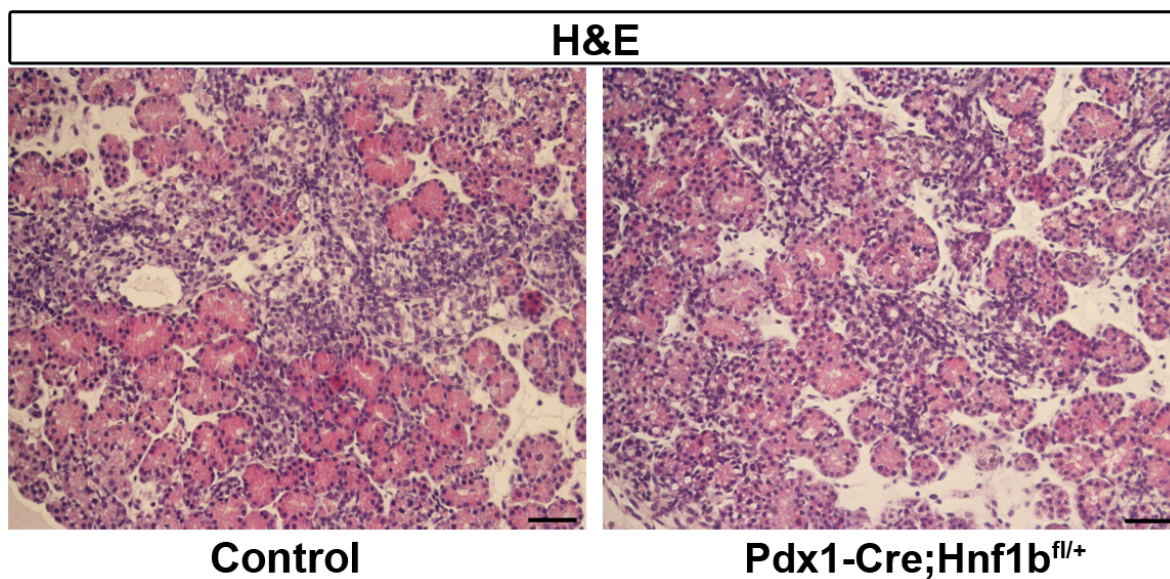

**Figure S2. Pancreatic hypoplasia and morphogenesis defects in *Sox9-CreER<sup>T2</sup>;Hnf1b<sup>Flox/LacZ</sup>* (TM E9.5) embryos.**

(A, B) Digestive tracts of controls and *Sox9-CreER<sup>T2</sup>;Hnf1b<sup>Flox/LacZ</sup>* (TM E9.5) mutants at E18.5 (C-F) Haematoxylin/Eosin staining of control and mutant pancreata at E16.5 and 18.5. Note the dramatic reduction in acinar cells in mutants (D, F) and cystic ducts (asterisks in F). (G) Pancreas weight of control, heterozygous (*Sox9-CreER<sup>T2</sup>;Hnf1b<sup>Flox/+</sup>*) and mutant (*Sox9-CreER<sup>T2</sup>;Hnf1b<sup>Flox/LacZ</sup>*) pancreata at E16.5 (TM at E9.5) (Control n=4, Heterozygous n=6, Mutant n=3), showing 40% decrease in mutants compared to controls. (H) qRT-PCR analysis of WT *Hnf1b* transcripts at E14.5 showing 70% decrease in *Hnf1b* expression in mutant pancreas (Control n=4, Mutant n=3). (I, J) Efficient *Hnf1b* inactivation in *Sox9-CreER<sup>T2</sup>;Hnf1b<sup>Flox/LacZ</sup>;R26R<sup>+YFP</sup>* (TM E9.5) mutant pancreas at E11.5 shown by Hnf1b (red) and GFP (green) immunostainings. Note the high number of GFP+ cells with almost no Hnf1b+ cells in the mutant pancreas. Nuclei were stained in blue with DAPI. Scale bars: 200  $\mu$ m in A-B; 50  $\mu$ m in C-F and I-J'.

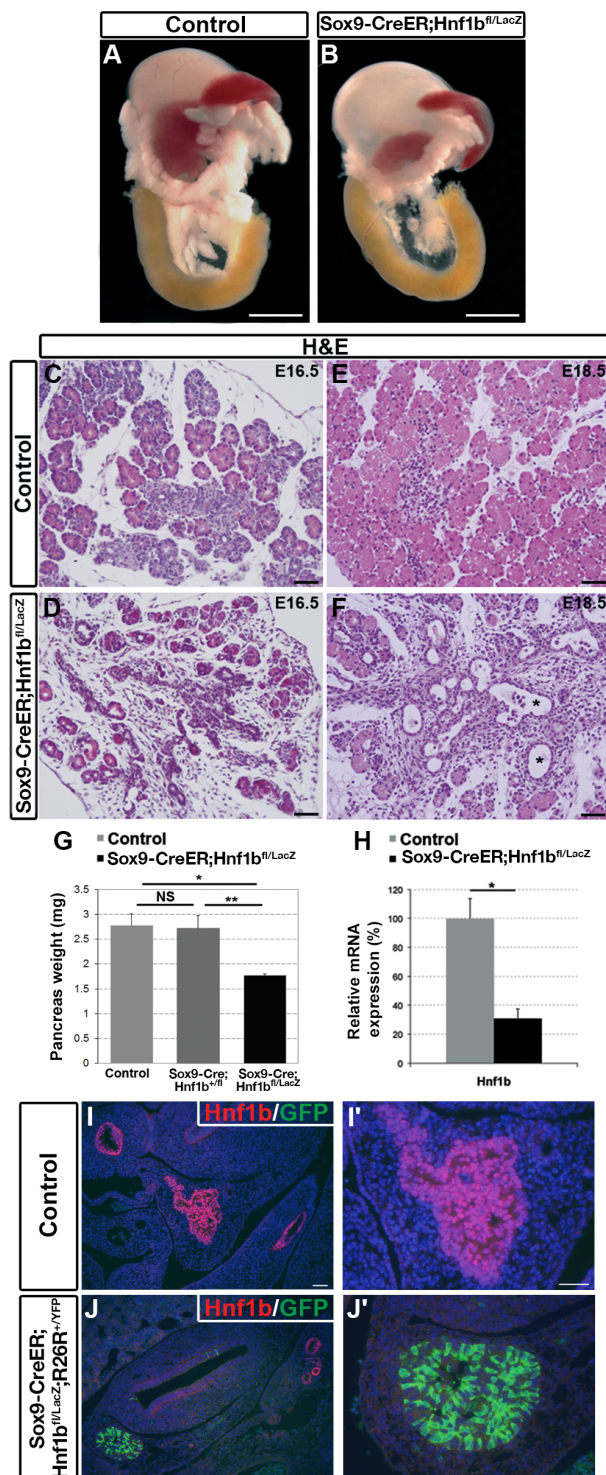

**Figure S3. Lack of endocrine precursors in *Sox9-CreER<sup>T2</sup>;Hnf1b<sup>Flox/LacZ</sup>* (TM E9.5) mutants.**

(A, B) Amylase (AMY, green) and NGN3 (red) immunostainings in control and *Sox9-CreER<sup>T2</sup>;Hnf1b<sup>Flox/LacZ</sup>* (TM E9.5) mutant pancreata at E16.5. Note the absence of Ngn3+ endocrine precursor cells in the mutant section (B). (C, D) Immunostainings of Insulin (INS, green) and Glucagon (GLUC, red) in control and *Sox9-CreER<sup>T2</sup>;Hnf1b<sup>Flox/LacZ</sup>* (TM E9.5) mutant pancreata at E18.5. (E) qRT-PCR analysis of *Ngn3*, *Glucagon*, *Insulin*, *Somatostatin* and *Amylase* expression in controls and mutants at E16.5 (Control n=10, Mutant n=3). Scale bars: 50  $\mu$ m.

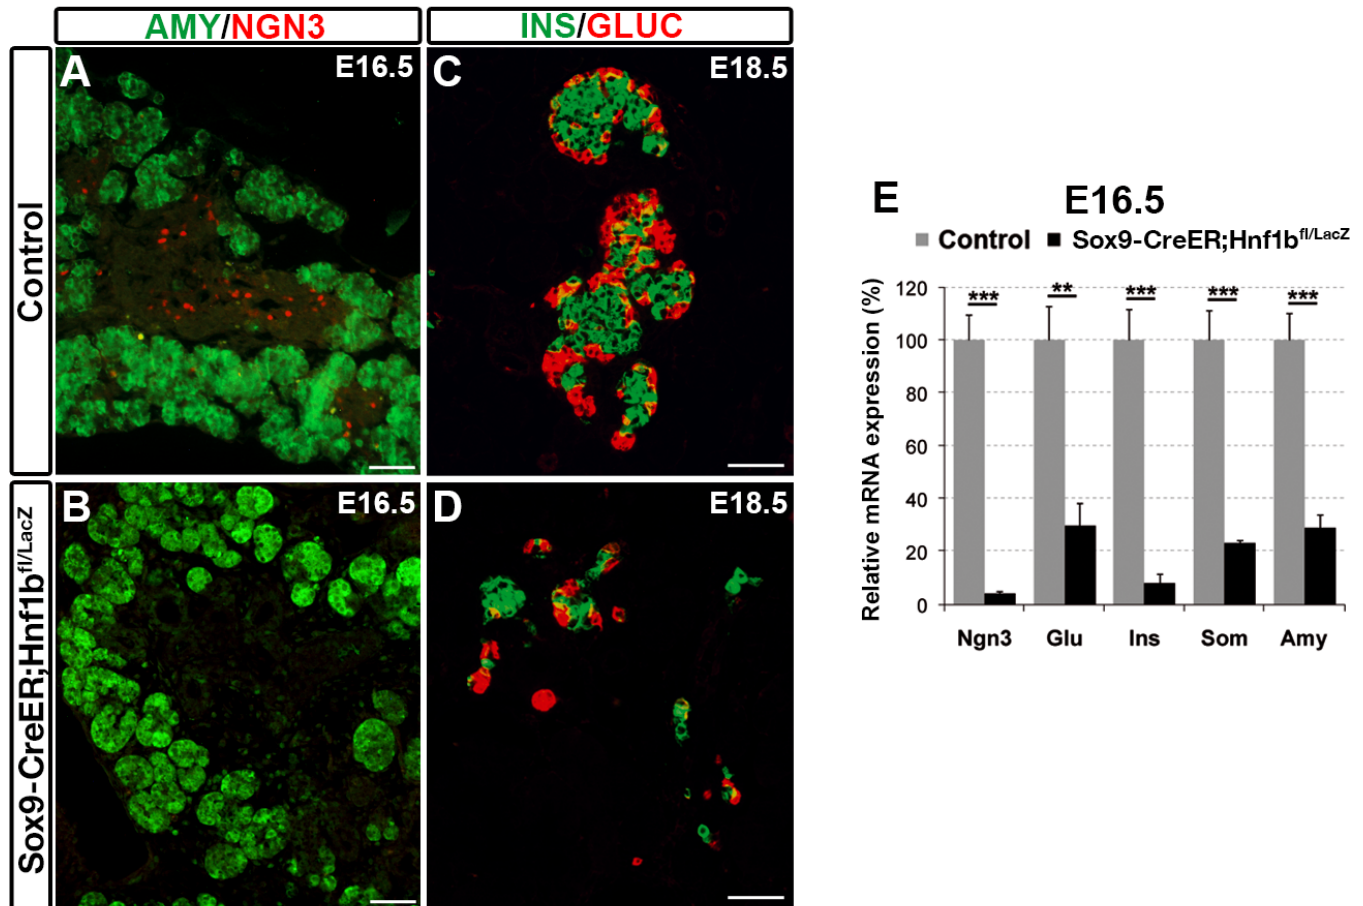

**Figure S4. Cystic ducts with polarity defects in *Sox9-CreER<sup>T2</sup>;Hnf1b<sup>Flox/LacZ</sup>* (TM E9.5) mutants.**

(A, B) *Sox9* immunohistochemistry of control and *Sox9-CreER<sup>T2</sup>;Hnf1b<sup>Flox/LacZ</sup>* (TM E9.5) mutant pancreata at E18.5. (C, D) Mucin1 (MUC1, green) and  $\beta$ -catenin (red) coimmunostainings in control and *Sox9-CreER<sup>T2</sup>;Hnf1b<sup>Flox/LacZ</sup>* (TM E9.5) mutant pancreata at E18.5. Note the polarity defects in epithelial cells lining the cysts, evidenced by a multilayered epithelium and a discontinuity in MUC1 expression at the apical region of ductal cells. Asterisks indicate cystic ducts in mutants (B, D). Scale bars: 50  $\mu$ m.

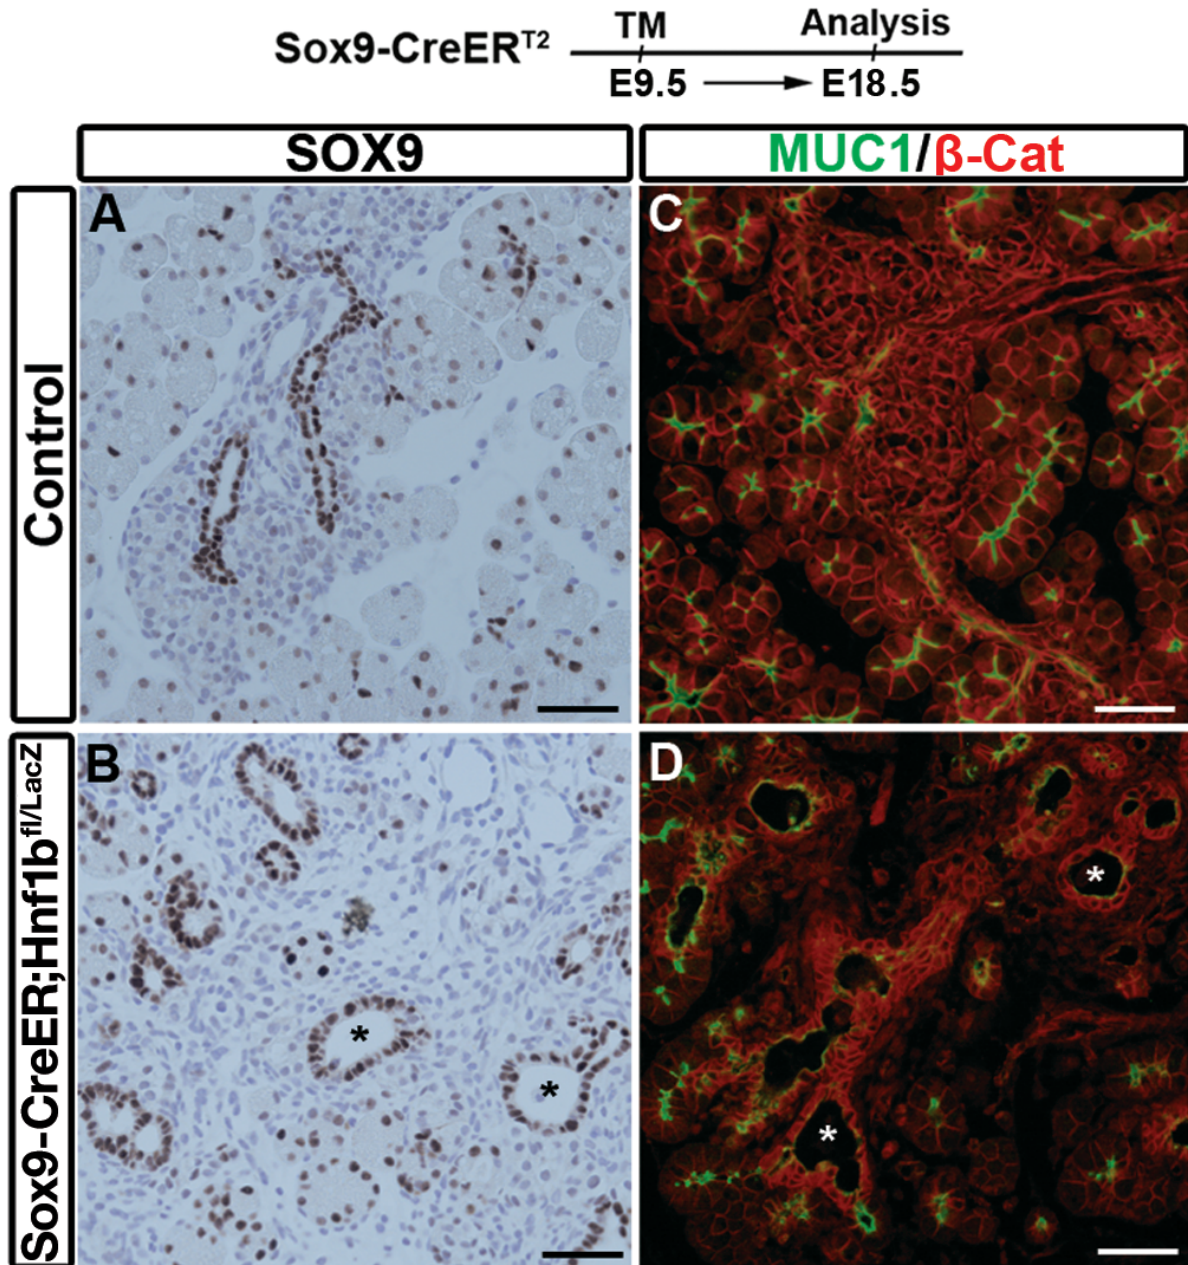

**Figure S5. Exocrine defects in *Sox9-CreER<sup>T2</sup>;Hnf1b<sup>Flx/LacZ</sup>* (TM E12.5) mutants.**

(A) qRT-PCR analysis of the acinar markers *Ptf1a*, *Nr5a2*, *Mist1* and *Amylase* in control and *Sox9-CreER<sup>T2</sup>;Hnf1b<sup>Flx/LacZ</sup>* (TM E12.5) mutant pancreata (Control n=8, Mutant n=7). (B-C) Amylase (AMY, green) staining showing a moderate loss of acinar cells in mutants. (D, E) MUC1 (green) and  $\beta$ -catenin (red) coimmunostainings showing cystic ducts and loss of polarity. Nuclei were stained in blue with DAPI. (F) qRT-PCR analysis of Notch pathway genes in control and *Sox9-CreER<sup>T2</sup>;Hnf1b<sup>Flx/LacZ</sup>* (TM E12.5) at E16.5 (Control n=8, Mutant n=7), showing an upregulation of *Notch2*, *Hey2* and *Heyl* at the onset of acinar differentiation.

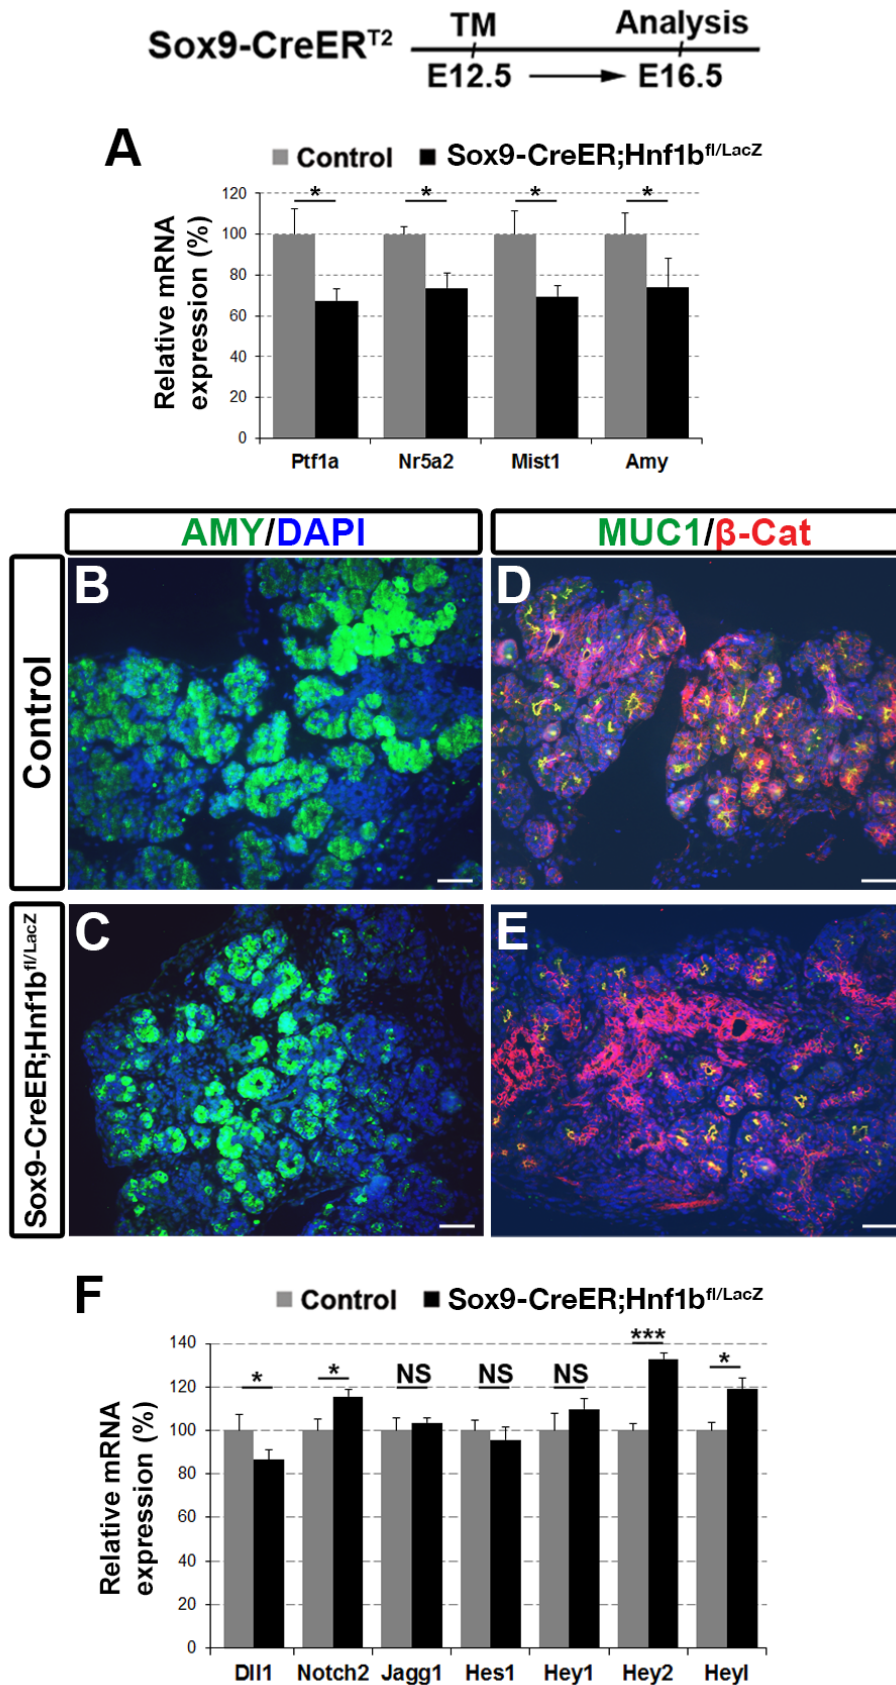

**Figure S6. Regulatory sequences in *Ngn3* promoter.**

Three regions upstream *Ngn3* TSS are represented: one distal (-5000 bp; -4740 bp), one intermediate (-4100 bp; -3200 bp) and one proximal (-900 bp; -170 bp). Putative binding sites for Hnf1b, Pdx1, Sox9 and FoxA2 were identified with the JASPAR database. Binding sites for Hnf6 were identified previously (Jacquemin et al., 2000). Sox9 binding sites could correspond to the ones previously described in the human promoter (-4061 bp; -3328 bp and -3306 bp; -400 bp and -385 bp; -161 bp upstream TSS) (Lynn et al., 2007). Intermediate regulatory sequences include the cluster 1 characterized in human (Lee et al., 2001). We identified 2 novel Hnf1b binding sites in the distal and the proximal regions, characterized by ChIP experiments (see Fig. 7). Hnf1b binding sites could correspond to putative ones in the human promoter identified by JASPAR database (-5043 bp, -3824 bp; -3783 bp; -445 bp).

-5000 ggtggcccaaatggtcgtcagaaccagagctctggagagggccagagttcagaccctgtgggctcctttccaggggaggt  
HNF1B  
ccaggcagccagccataaggttatattgagcccttctccaagcgtcacttgctgagcgttcataaaagggtaggtatc  
PDX1 SOX9 FOXA2 FOXA2  
aacatggtgaccattagaggtgaccttcatctcctctgacttccttgtttgttttggacagagagaatcacgaagttgttattttccaac... -4740

-4100 SOX9  
taaagacctgggtgctccagagctccagccccttctcccttgttcgaggactcctgggccaagctccctctgctgctctgtggggtg  
catatggcgcctctcacctaccaagaaaaggaaccaggcactcattcaagagcgacaagctcccagggccccagagggggagtcac  
taagggaatggcccctctctcaagccatgagcagctgccttatctgtcccaccaactgacacagctctcagctggtgacagccg  
ttgggtgggagcaaggcgtggccgagcagccagcggaagcggccagctcctggcagatgaaataggggtggtgagcccctggag  
accatagcttcaataaagaagacaaataggatcgagataggccttgcagccaactgttataaatgagtggaattggccaatgtaca  
HNF6  
cgggggcagggcccctggggggaggcccgtcagtgccaaatcatgtgtcagcttctaggacaggtgtgccaggggccagggggccagg  
FOXA2  
tctcccccccctccggattatcacggcaaagtaataattgtgtaactatgagtaaacagtcattgtgaagaccaaggagagttatcagg  
caaactagttggtggggaggcttaacaataaaagttgctgccttaggagcaggtgatggctggctacgcagactcccggcagatgttttc  
HNF1B FOXA2 SOX9  
PDX1  
aaagcatcccgtttacaatctctgtaattattattaaacggaatctattattattatttttagcaaacactgggacaggtgggcttcttttg  
SOX9  
tcgtctcctttgttgaagggtgttgaagtgccagctctcggtccggcagctc... -3200

-900 HNF6  
tttcctatcacctcctctcgggtcaggccttcccgatgcatccatagtggggcggggcgtgatgagatgccccctctgactctctctac  
SOX9  
aaccaccctgcctccggaatagaaccaatgtctcggatgagactatggtgggggtttcaaggtctggtctggggctggagggttg  
HNF1B SOX9  
atcccaagggtgatattgaacctggccaagcaatagtttctgagtagaaaggacttgagcagggaccgtctctggtcactctgtcctctttcc  
PDX1  
aggatggagtcagctctgtgaaacatggttcacacacatttctgaccaaccaatagtgccggagagctggatagcactttgaactaattg  
gcgctctcccagctgccagccaagaagacacttgactccttgatcgctggttcatttagacaagccgttccctctctgagccaaaagacc  
catgtgtaataactcaaagaagagccttcttatatatatagaccaccccaaacctctcatgctaccaagaaaggtctggacacatgc  
caaaaagaaagaggaaaagcaagctctcccagcggccggacgggactcttctggctggcgaggctctttgaggaaccgagaggttc  
SOX9  
tgggactgagcccgacggggggaggcgtggagtgggggaacaaacagagtctgctcccctccccgaccctgcccttgtccgga... -170

**Table S1 : Primary and Secondary antibodies**

| <b>Primary antibodies</b> |                  |                 |                                                        |
|---------------------------|------------------|-----------------|--------------------------------------------------------|
| <b>Antigen</b>            | <b>Host</b>      | <b>Dilution</b> | <b>Source</b>                                          |
| Hnf1b                     | rabbit           | 1/50            | Santa Cruz                                             |
| GFP                       | chicken          | 1/500           | Aves Labs                                              |
| P-Histone H3              | mouse            | 1/300           | Millipore                                              |
| Pdx1                      | rabbit           | 1/1200          | C. Wright, Vanderbilt University, USA                  |
| E-cadherin                | mouse            | 1/100           | BD Transd. Lab.                                        |
| Ngn3                      | guinea pig       | 1/1000          | M. Sander, University of California-San Diego, USA     |
| CPA1                      | rabbit           | 1/500           | Biogenesis                                             |
| Insulin                   | rabbit           | 1/1000          | ImmunoStar                                             |
| Glucagon                  | mouse            | 1/1000          | Sigma                                                  |
| Amylase                   | rabbit           | 1/300           | Sigma                                                  |
| Sox9                      | rabbit           | 1/300           | Chemicon                                               |
| MUC1                      | Armenian hamster | 1/100           | Neomarkers                                             |
| beta-Catenin              | mouse            | 1/100           | BD Transd. Lab.                                        |
| acetylated alpha-Tubulin  | mouse            | 1/300           | Sigma                                                  |
| Hnf6                      | guinea pig       | 1/5000          | P. Jacquemin & F. lemaigre, De Duve Institute, Belgium |
| pan-Cytokeratin           | mouse            | 1/100           | Sigma                                                  |
| Ezrin                     | rabbit           | 1/300           | S. Louvet, UMR7622 CNRS UPMC, France                   |
| Dystroglycan              | rabbit           | 1/200           | Novus Biologicals                                      |
| Laminin                   | rabbit           | 1/50            | Sigma                                                  |
| AQP1                      | rabbit           | 1/100           | Interchim                                              |
| PKCz                      | rabbit           | 1/500           | Sigma                                                  |

  

| <b>Secondary antibodies</b> |                  |                 |               |
|-----------------------------|------------------|-----------------|---------------|
| <b>Conjugation</b>          | <b>Species</b>   | <b>Dilution</b> | <b>Source</b> |
| Cy3                         | rabbit           | 1/500           | Jackson       |
| Alexa Fluor 488             | rabbit           | 1/500           | Invitrogen    |
| Alexa Fluor 488             | mouse            | 1/500           | Invitrogen    |
| Alexa Fluor 488             | chicken          | 1/500           | Jackson       |
| FITC                        | Armenian hamster | 1/500           | Jackson       |
| Biotin                      | rabbit           | 1/1000          | Vector        |
| Streptavidin-Alexa 594      | -                | 1/500           | Jackson       |



**Table S2. Oligonucleotide sequences for qRT-PCR and ChIP experiments.****qRT-PCR gene expression**

| Name                 | Forward Sequence (5'→3')  | Reverse Sequence (5'→3')   |
|----------------------|---------------------------|----------------------------|
| <i>Cyclophilin A</i> | CAGGTCCTGGCATCTTGTCC      | TTGCTGGTCTTGCCATTCCT       |
| <i>Hnf1b</i>         | GGCCTACGACCGGCAAAAGA      | GGGAGACCCCTCGTTGCAAA       |
| <i>Sox9</i>          | AAGCCGACTCCCCACATTCCTC    | CGCCCCTCTCGTTCAGATCAA      |
| <i>Hnf6</i>          | CAAATCACCATCTCCCAGCAG     | CAGACTCCTCCTCTGGCATT       |
| <i>Ptfla</i>         | TTCCTGAAGCACCTTTGACAGA    | ACGGAGTTTCTGGACAGAGT       |
| <i>Pdx1</i>          | CCAGATCTGCCTCTAGGACTCTT   | CAGTTTGGAGCCCAGGTTGT       |
| <i>Muc1</i>          | CTCTGGAAGACCCAGCTCCAA     | CCACGGAGCTGACCTGAACT       |
| <i>Spp1</i>          | CCCTCCCGGTGAAAGTGA        | GCACCAGCCATGTGGCTATAGG     |
| <i>Mist1</i>         | TGGGCCTCCAGATCTCACCAA     | CGTCACATGTCAGTTTCTCTGCT    |
| <i>Nr5a2</i>         | CTGCTGGACTACACG GTTTGC    | CTGCCTGCTTGCTGATTGC        |
| <i>Ck19</i>          | ACCCTCCCAGATTACAACC       | TCTGAAGTCATCTGCAGCCA       |
| <i>Pkhd1</i>         | TGCTCCTCAGGCAGGCAATCG     | ACCTGTACCCTGGGGTGGCTT      |
| <i>Kif12</i>         | ACGAGGCTTCTATGTGGAACAG    | GAGGTACCTGCTGAGAAGTTGG     |
| <i>Cys1</i>          | AGAGGAGCTCATGGCGAGCATT    | GCCTGTGGCACAGATGCCAAGA     |
| <i>Glis3</i>         | TGGGAAGCCTCAGTTCCAGGTC    | GCACTGAGGCCCAAAGCCAA       |
| <i>Bicc1</i>         | ACTCGGTGGAAGGCTGCAATGA    | AGTCGCCAGCGTTTCCAGAATG     |
| <i>Pkd1</i>          | GCTGCATGCCAGTTCTTTTG      | TTTTAAAGTGCAGAAGCCCCA      |
| <i>Pkd2</i>          | CATGTCTCGATGTGCCAAAGA     | ATGGAGAACATTATGGTGAAGCC    |
| <i>Ngn3</i>          | TTCCGCCACAACACTACATCTG    | TTGGGAGACTGGGGAGTAGA       |
| <i>Glucagon</i>      | CCAAGAGGAACCGGAACAAC      | CCTTCAGCATGCCTCTCAAAT      |
| <i>Insulin</i>       | ATCCACAATGCCACGCTTCT      | AAACCCACCCAGGCTTTTGT       |
| <i>Somatostatin</i>  | TCCGTCAGTTTCTGCAGAAGTCTC  | GTACTIONGGCCAGTTCCTGTTTCCC |
| <i>Amylase</i>       | CTGGGTTGATATTGCCAAGG      | TGCACCTTGTACCATGTCT        |
| <i>Notch1</i>        | AACACCGCCCGTGGATTTCAT     | ACATGTGGCACCCCTCGAAGC      |
| <i>Notch2</i>        | CCTGCCAGGTTTTGAAGGGA      | GGGCAGTCGTCGATATTCCG       |
| <i>Dll1</i>          | GCCCTCCATACAGACTCTCCC     | AGGCGGCTGATGAGTCTTTCT      |
| <i>Jag1</i>          | TGCCCTCCAGGACATAGTGG      | ACTCTCCCCATGGTGATGCA       |
| <i>Rbpj</i>          | GTTTTGGCGAGAGTTTGTGGAAGAT | TGGAGGCCGCTCACCAAACCT      |
| <i>Lfng</i>          | CTCGCGCCACAAGGAGATGAC     | CCGAGGAGCAGTTGGTGAGCA      |
| <i>Hes1</i>          | CAAAGACGGCCTCTGAGCAC      | CCTTCGCCTCTTCTCCATGAT      |
| <i>Hes5</i>          | CTCCGCTCGCTAATCGCCTC      | TCTCCACCGCCACGGTACTT       |
| <i>Hey1</i>          | TCACCTGAAAATGCTGCACAC     | CGTGCGCGTCAAAAATAACCT      |
| <i>Hey2</i>          | AGCGCCCTTGTGAGGAAACGA     | TGTAGCGTGCCCAGGGTAATTG     |
| <i>Heyl</i>          | CAGCCCTTCGCAGATGCAA       | CCAATCGTCGCAATTCAGAAAG     |
| <i>Fgfr2b</i>        | TGATGGGCTGCCCTACCTCAA     | CCCCAGCATCCATCTCCGTCA      |
| <i>Fgfr4</i>         | CAGGCCTTCCACGGGGAGAAT     | CACGGTCCGAGGGTACCACA       |

**qPCR ChIP**

| <b>Name *</b>          | <b># of HNF1B binding sites</b> | <b>Forward Sequence (5'→3')</b> | <b>Reverse Sequence (5'→3')</b> | <b>Amplicon genome location</b> |
|------------------------|---------------------------------|---------------------------------|---------------------------------|---------------------------------|
| <i>Ngn3</i> -700bp     | 1                               | TGGAGGGTTGGATCCCAAGTG           | CAGAGACGGTCCCTGCTCAAGT          | chr10:61,595,110-61,595,193     |
| <i>Ngn3</i> -3300bp    | 1                               | GGGGACAGGTGGGGCTTTCTT           | GGGACCGAGACTGGCCACTT            | chr10:61,592,554-61,592,627     |
| <i>Ngn3</i> -4900bp    | 1                               | GGCCCCAAATGGTCGTCAGAAC          | CAAGCCAAGTGAGCGCTTGA            | chr10:61,590,840-61,590,975     |
| <i>Hnf6</i> +4950bp    | 2                               | CTTGCAGCTTGGTTGATTGA            | CGGCAGTACCAGACACTTGA            | chr9:74714652-74714752          |
| <i>Cys1</i> -4500bp    | 4                               | TGATGGGAGTGTCCCGTGCAA           | CATGGCTGGCTGTGTGCAGAA           | chr12:25,371,128-25,371,227     |
| <i>Pkhd1</i> -70bp     | 1                               | TCCTGTTGGACTGGAActCA            | AGCCCTTCTTTGGGTCTCT             | chr1:20,608,118-20,608,248      |
| <i>Glis3</i> +120100bp | 2                               | CAACAAGAAGCCCTTTTGA             | CATGTCAGAGATGAGGGAGGT           | chr19:28,634,413-28,634,533     |
| <i>Fgfr4</i> +280bp    | 2                               | AGCGCACACAGGGCCTTT              | GCCCCGGTGGGCAATAAGT             | chr13:55,254,476-55,254,555     |
| <i>Bicc1</i> +2857     | 1                               | CCCCCAGGACAGTCTCTAAAA           | TGGCCTTCAAGTCTCAGAGTG           | chr10:71,156,782-71,156,857     |

\* Primer names indicate the approximate position of the HNF1B-binding site/s amplified, relative to the TSS of the respective gene.
